# Supplementary material
Source: PubMed Central journal article supplement (PMC7362354)
Supplement: advancesADV2019001350-suppl1.pdf [file advancesADV2019001350-suppl1.pdf]

Supplementary file:

## Bayesian Multilevel Regression Model Specifications for Subject-level Data at Baseline/Disease Progression

A Bayesian multilevel regression model was applied for the subject-level data separately at the time of baseline and disease progression. Let binary outcome  $Y_{ijk}$  denote the mutation status of gene  $k$  for the  $i^{\text{th}}$  patient in the  $j^{\text{th}}$  study, and  $X_j$  the moderators from  $j^{\text{th}}$  study, including the type of technology used to gather molecular information, and type of study which is either an observational or experimental study. Denote  $p_{ijk}$  the corresponding mutation probability of gene  $k$  for the  $i^{\text{th}}$  patient in the  $j^{\text{th}}$  study.

$$Y_{ijk} \sim \text{Bernoulli}(p_{ijk})$$

$$\text{logit}(p_{ijk}) = \log\left(\frac{p_{ijk}}{1 - p_{ijk}}\right) = \mu + \alpha_i + \beta_j + \eta_k$$

where  $\alpha_i$  is subject effect,  $\beta_j$  is study effect, and  $\eta_k$  is gene effect.

We assumed normal distributions on the regression coefficients,

$$\alpha_i \sim N(0, \sigma_\alpha^2), \beta_j \sim N(\beta_j^{\text{tech}} + \beta_j^{\text{type}}, \sigma_\beta^2), \eta_k \sim N(0, \sigma_\eta^2),$$

with  $X_j$  effects estimated by  $\beta_j^{\text{tech}}$  and  $\beta_j^{\text{type}}$  and a random error term. Weakly-informative *Cauchy* prior distributions [1] were applied on  $\mu$ ,  $\beta_j^{\text{tech}}$  and  $\beta_j^{\text{type}}$  and half-*Cauchy* prior distributions [2] on the standard deviations  $\sigma_\alpha$ ,  $\sigma_\beta$ ,  $\sigma_\eta$ .

$$\mu, \beta_j^{\text{type}}, \beta_j^{\text{tech}} \sim C(0, A = 2.5),$$

$$\sigma_\alpha, \sigma_\beta, \sigma_\eta \sim C^+(0, A = 2.5).$$

---

[1] Gelman, A., Jakulin, A., Pittau, M. G., & Su, Y. S. (2008). A weakly informative default prior distribution for logistic and other regression models. *The annals of applied statistics*, 2(4), 1360-1383.

[2] Gelman, A. (2006). Prior distributions for variance parameters in hierarchical models. *Bayesian analysis*, 1(3), 515-533.

## 33 Genes Identified in MCL Literature

### Tumor Suppressor

*TP53* (Tumor Protein P53)

*RB1* (RB Transcriptional Corepressor 1)

### DNA Damage Response

*ATM* (Ataxia Telangiectasia Mutated)

### NOTCH Signaling Pathway

*NOTCH1* (Notch homolog 1)

*NOTCH2* (Notch homolog 2)

*SPEN* (Spn Family Transcriptional Repressor)

### CDK Kinase Regulators

*CCND1* (Cyclin D1)

*CCND3* (Cyclin D3)

*CDKN2A* (Cyclin Dependent Kinase Inhibitor 2A)

### Histone Modification/Epigenetic

*KMT2D* (Lysine Methyltransferase 2D)

*KMT2C* (Lysine Methyltransferase 2C)

*KMT2A* (Lysine Methyltransferase 2A)

*NSD2* (Nuclear Receptor Binding SET Domain Protein 2)

*BCOR* (BCL6 Corepressor)

### Apoptosis Regulators

*BIRC3* (Baculoviral IAP Repeat Containing 3)

*MYC* (MYC Proto-Oncogene)

### B-cell Receptor Signaling

*CARD11* (Caspase Recruitment Domain Family Member 11) [NF-KB]

*TRAF2* (TNF Receptor Associated Factor 2) [NF-KB; JNK]

*MAP3K14* (Mitogen-Activated Protein KK Kinase 14)

*BTK* (Bruton Tyrosine Kinase)

### Protein Ligase

*UBR5* (Ubiquitin Protein Ligase E3 Component N-Recognin 5)

### Myelopoiesis

*TET2* (Tet Methylcytosine Dioxygenase 2)

### Immune Response

*IGH* (immunoglobulin Heavy Locus)

*MEF2B* (Myocyte Enhancer Factor 2B)

*SP140* (SP140 Nuclear Body Protein)

*TLR2* (Toll Like Receptor 2)

*S1PR1* (Sphingosine-1-Phosphate Receptor 1)

### Chromatin Modification

*SMARCA4* (SWI/SNF Related, Matrix Associated, Actin Dependent Regulator of Chromatin, Subfamily A, Member 4)

*ARID2* (AT-Rich Interaction Domain 2)

*ARID1B* (AT-Rich Interaction Domain 1B)

*CHD2* (Chromodomain Helicase DNA Binding Protein 2)

### Other

*RIMS2* (Regulating Synaptic Membrane Exocytosis 2)

*FAT4* (FAT Atypical Cadherin 4)
